# Supplementary material for: O-methylated N-glycans Distinguish Mosses from Vascular Plants
Source: MDPI journal article supplement (doi:10.3390/biom12010136), 2022-01-15
Supplement: s1 [file s1]

Supporting Information for

# O-methylated N-glycans Distinguish Mosses from Vascular Plants

David Stenitzer <sup>1</sup>, Reka Mocsai <sup>1</sup>, Harald Zechmeister <sup>2</sup>, Ralf Reski <sup>3</sup>, Eva L. Decker <sup>3</sup>, Friedrich Altmann <sup>1,\*</sup>

<sup>1</sup> Department of Chemistry, Institute of Biochemistry, Universität für Bodenkultur Wien, Muthgasse 18, A-1190 Vienna, Austria; david.stenitzer@boku.ac.at (D.S.); reka.mocsai@boku.ac.at (R.M.); friedrich.altmann@boku.ac.at (F.A.)

<sup>2</sup> Department of Botany and Biodiversity Research, University of Vienna, Rennweg 14, 1030 Vienna, Austria; [harald.zechmeister@univie.ac.at](mailto:harald.zechmeister@univie.ac.at) (H.Z.).

<sup>3</sup> Plant Biotechnology, Faculty of Biology, University of Freiburg, Schänzlestrasse 1, 79104 Freiburg, Germany; [ralf.reski@biologie.uni-freiburg.de](mailto:ralf.reski@biologie.uni-freiburg.de) (R.R.); eva.decker@biologie.uni-freiburg.de (E.L.D.).

\* Correspondence: [friedrich.altmann@boku.ac.at](mailto:friedrich.altmann@boku.ac.at) (F.A)

**Table S1: Identification of the 14 Da mass increment as methyl group rather than oxidation.** The measured and calculated mass increments are given. The 0.01 % (p = 0.0001) confidence interval was calculated from the eight values.

| Glycan | m/z             | delta  |  | Statistics       |           |
|--------|-----------------|--------|--|------------------|-----------|
| MMX    | <b>1065.358</b> |        |  | average          | 14.020    |
|        | 1079.380        | 14.022 |  | std. dev.        | 0.008     |
|        | 1093.390        | 14.010 |  | conf. int 0.01 % | +/- 0.015 |
| MMXF   | <b>1211.422</b> |        |  |                  |           |
|        | 1225.438        | 14.016 |  | upper limit      | 14.035    |
|        | 1239.466        | 14.028 |  | lower limit      | 14.005    |
| MGNX   | <b>1268.446</b> |        |  | of 0.01 %        |           |
|        | 1282.463        | 14.017 |  | conf.-interval   |           |
|        | 1296.474        | 14.011 |  |                  |           |
| MGNXF  | <b>1414.498</b> |        |  | calc. increment  |           |
|        | 1428.519        | 14.021 |  | methyl           | 14.016    |
|        | 1442.551        | 14.032 |  | oxidation        | 13.979    |

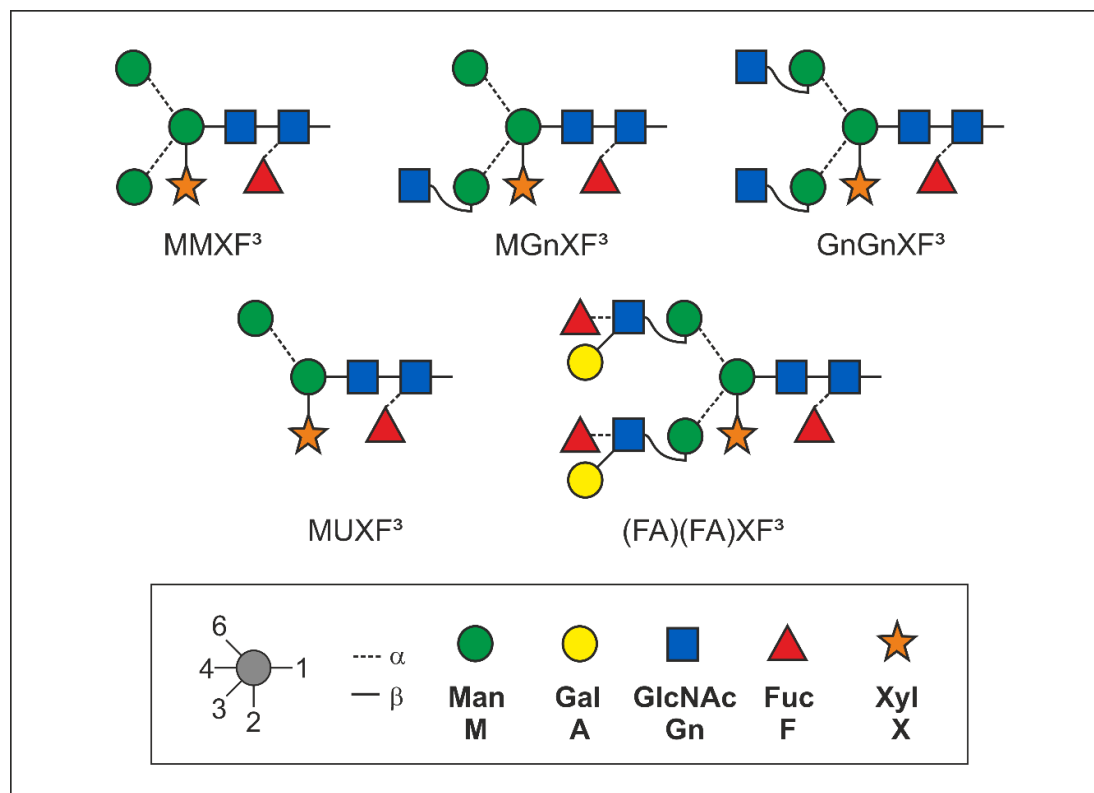

**Figure S1: Structures of plant N-glycans.** The proglycan nomenclature lists the terminal residues in a counter clockwise manner.

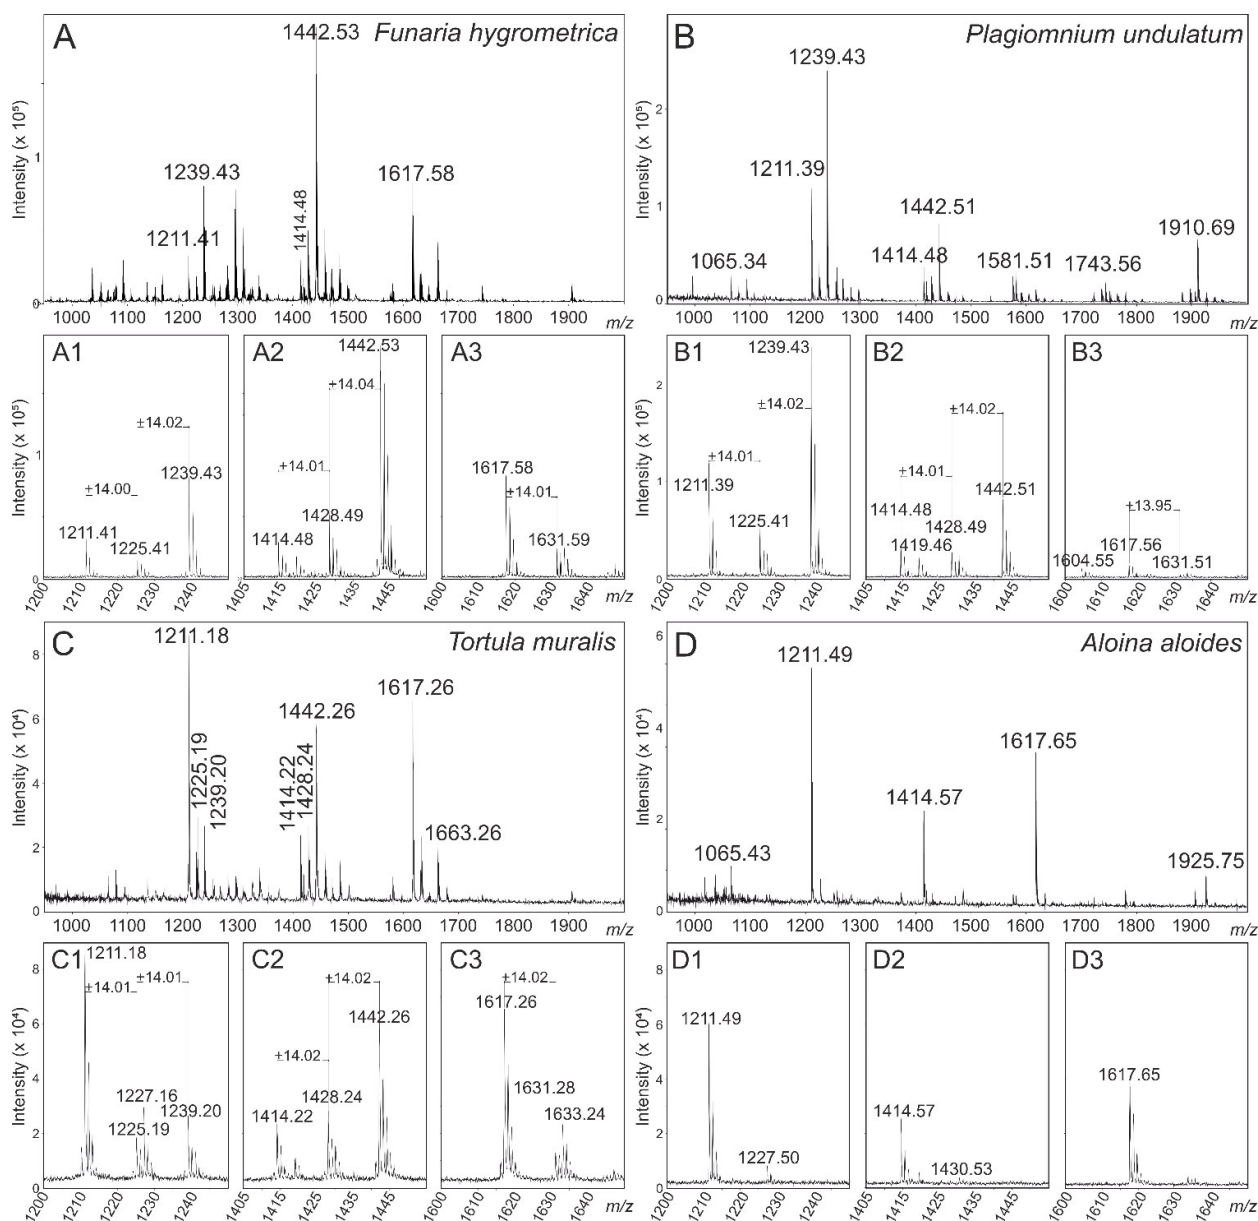

**Figure S2: MALDI-TOF measurements from different mosses.** MALDI-TOF measurements from native N-glycan pools from *Funaria hygrometrica* (A), *Plagiomnium undulatum* (B), *Tortula muralis* (C) and *Aloina aloides* (D). A1-D3 show zoomed in areas of the overall spectra.

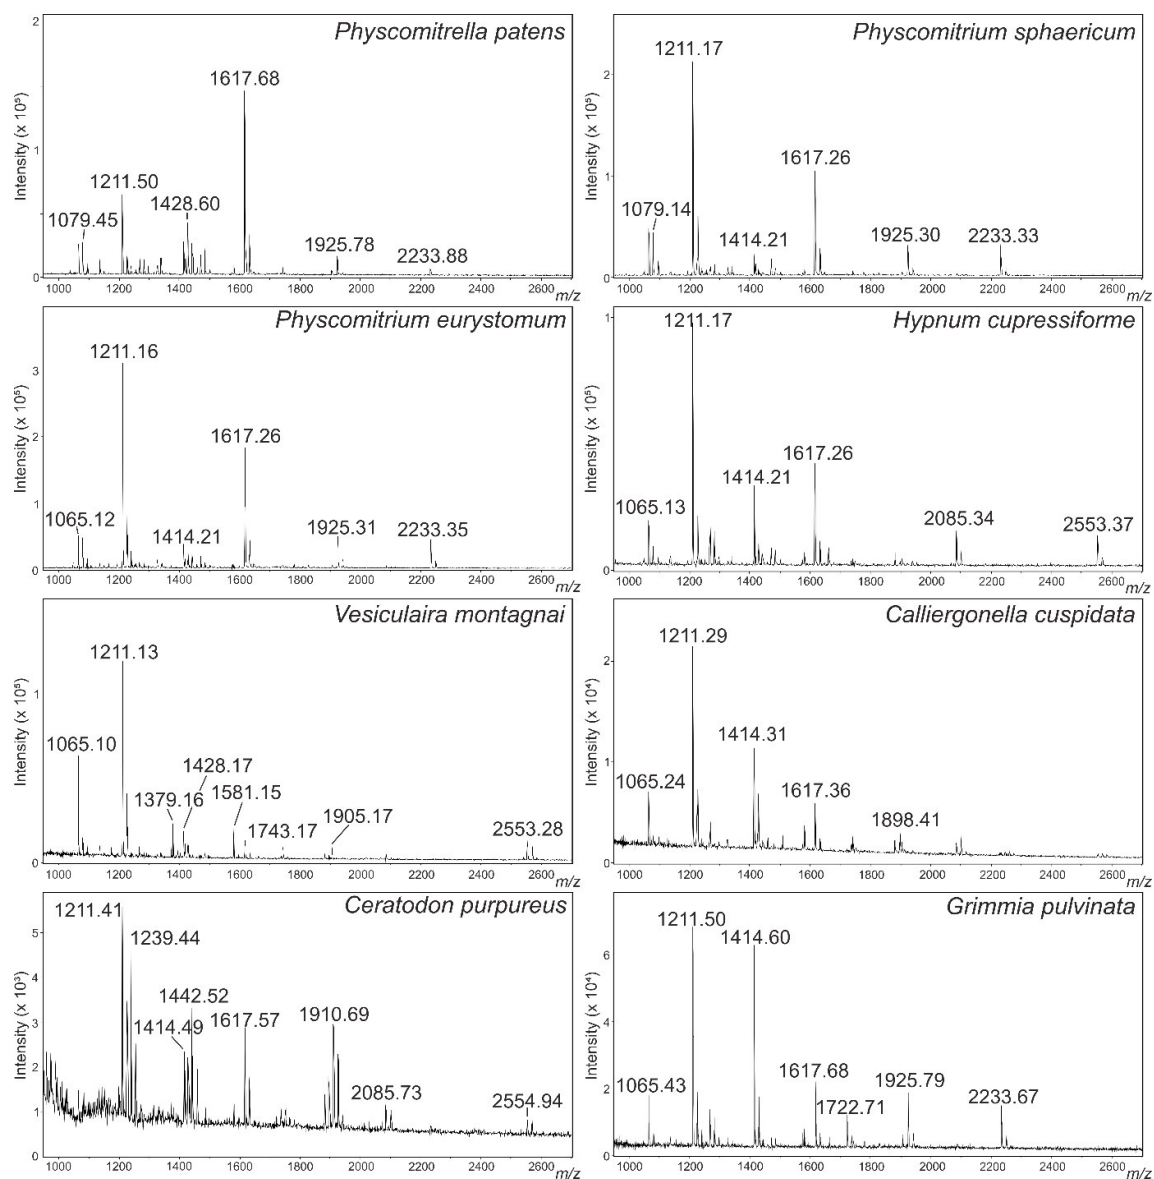

**Figure S3A: MALDI-TOF-MS of different moss species. Whole glycan pools from the analysed moss species.**

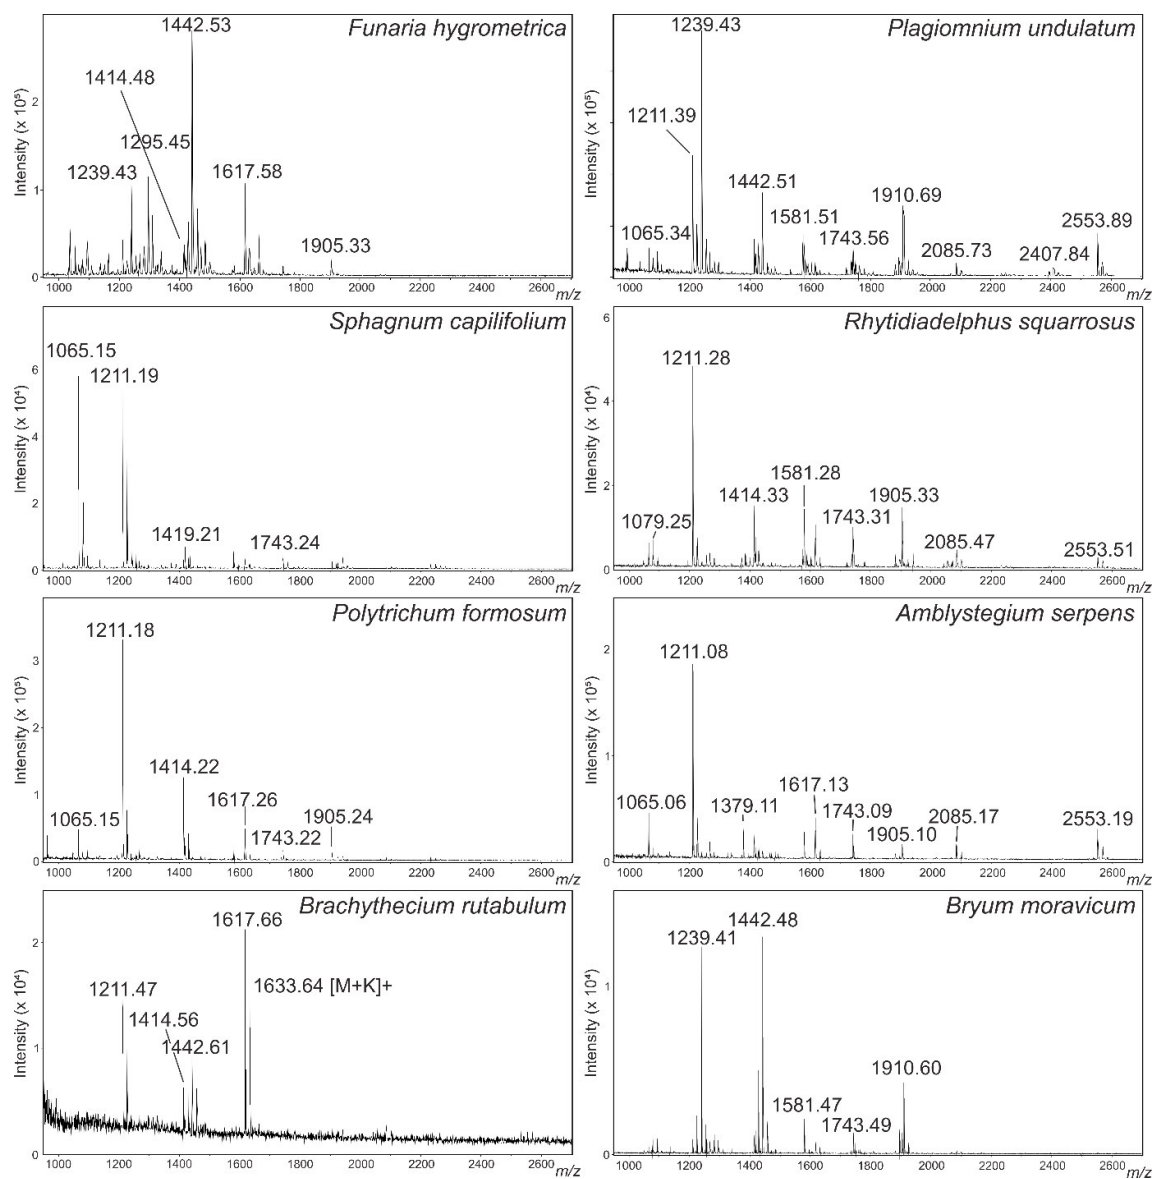

**Figure S3B: MALDI-TOF-MS of different moss species. Whole glycan pools from the analysed moss species.**

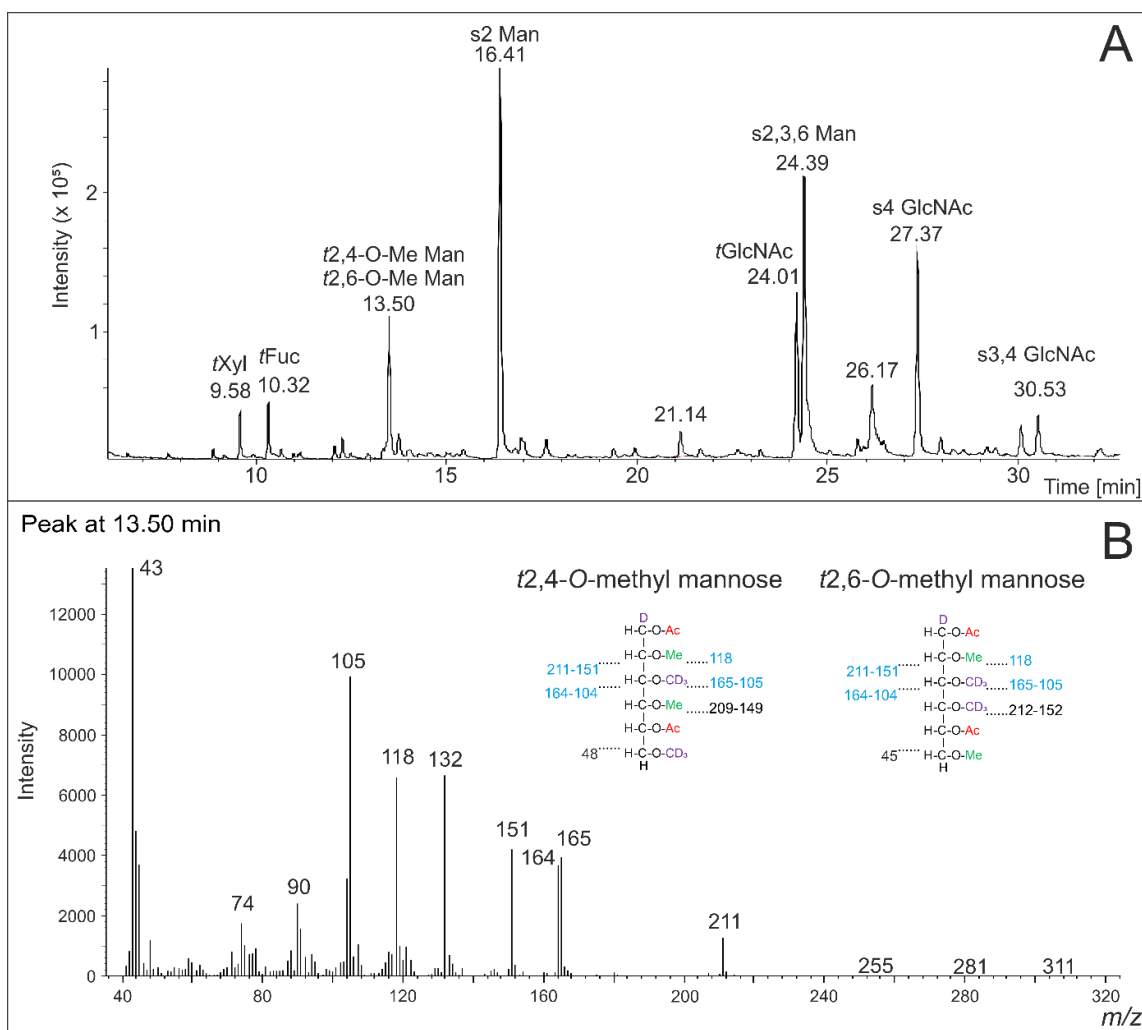

**Figure S4A: (A): GC-MS measurements of the HILIC-fractionated main glycan from *Funaria hygrometrica*. The chromatogram from the first measurement of the sample treated with iodomethane-d<sub>3</sub> revealed the doubly methylated mannose in a MGnXF. (B): The MS spectrum of this experiment could not clearly distinguish between 2,4-methylated mannose or a 2,6-methylated mannose.**

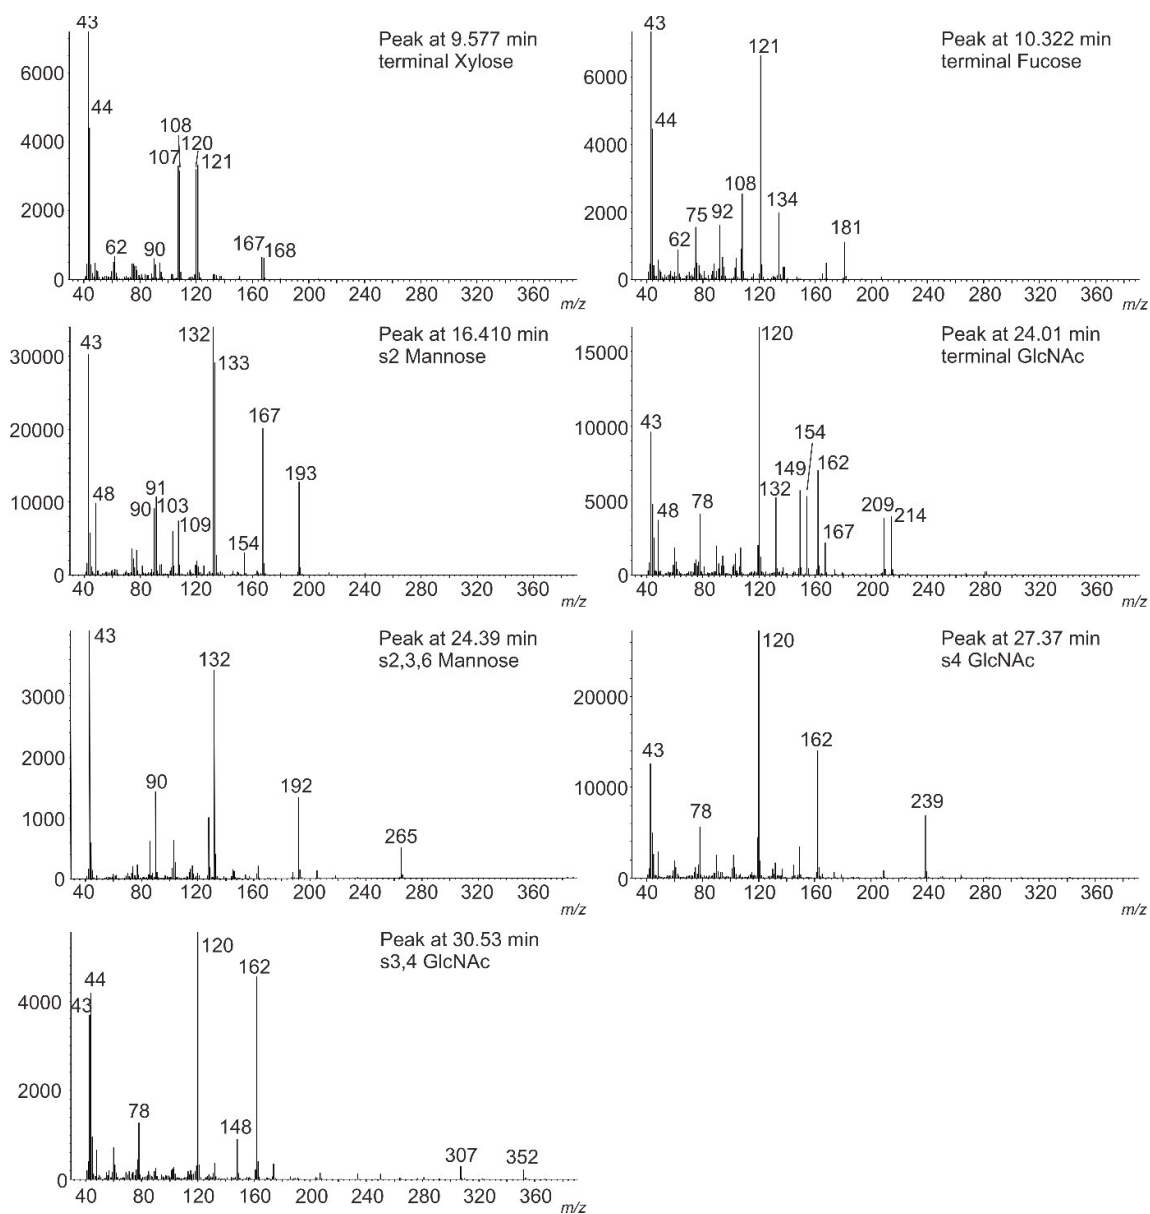

**Figure S4B: GC-MS measurements of the hydrolysed, peracetylated main glycan from *Funaria hygrometrica* treated with iodomethane- $d_3$  before hydrolysis. The resulting MS-spectra revealed the linkages between the monosaccharides as well as the possible methylation sites.**

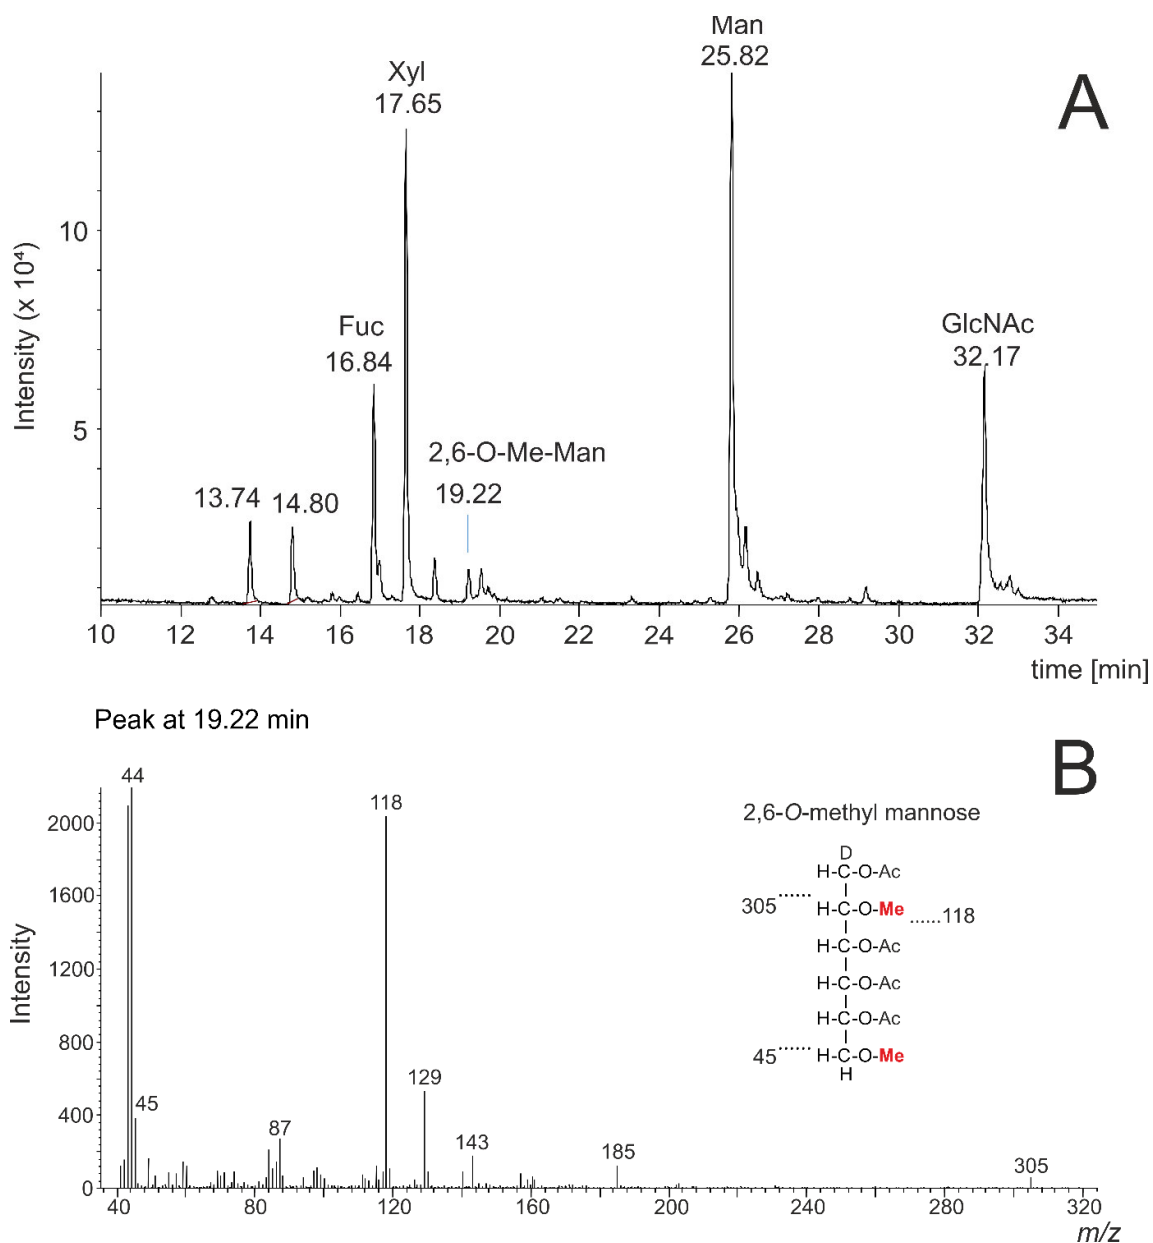

**Figure S5A: Localization of the methyl groups on the mannose of MGnXF of *Funaria hygrometrica*.** (A): GM-MS chromatogram of the hydrolysed and peracetylated main glycans from *Funaria hygrometrica* without the treatment of iodomethane-d3. (B): MS spectrum of the peak “19.22 min”. With these measurements the methylation sites of the mannose were shown.



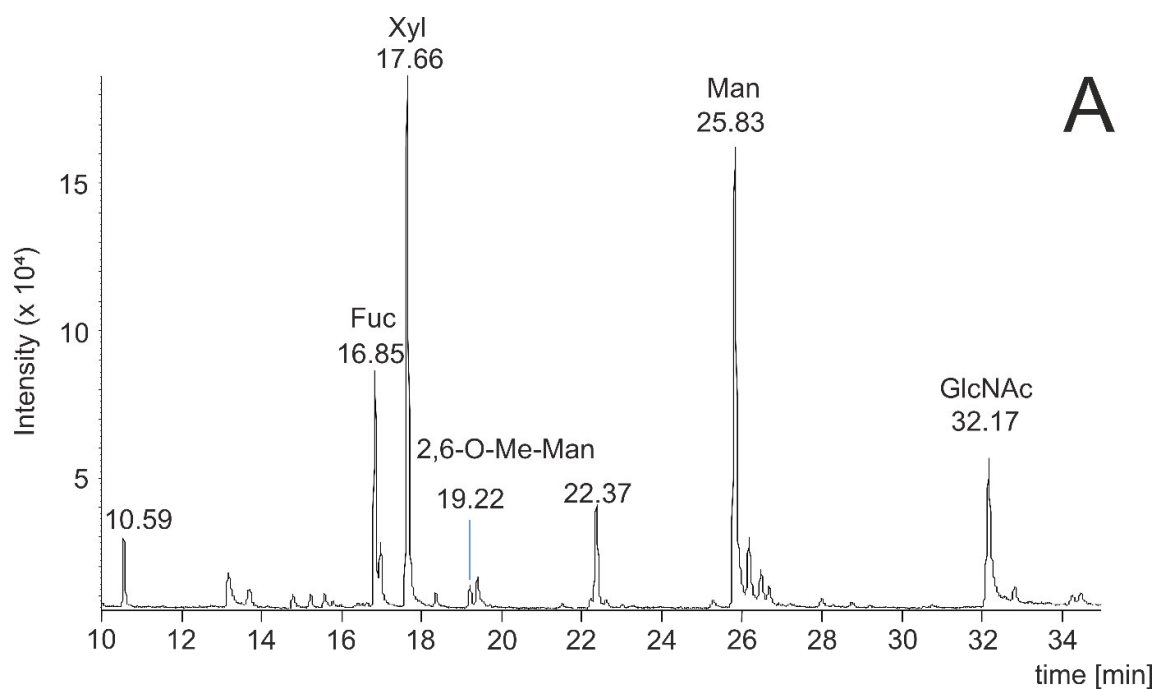

Peak at 19.22 min

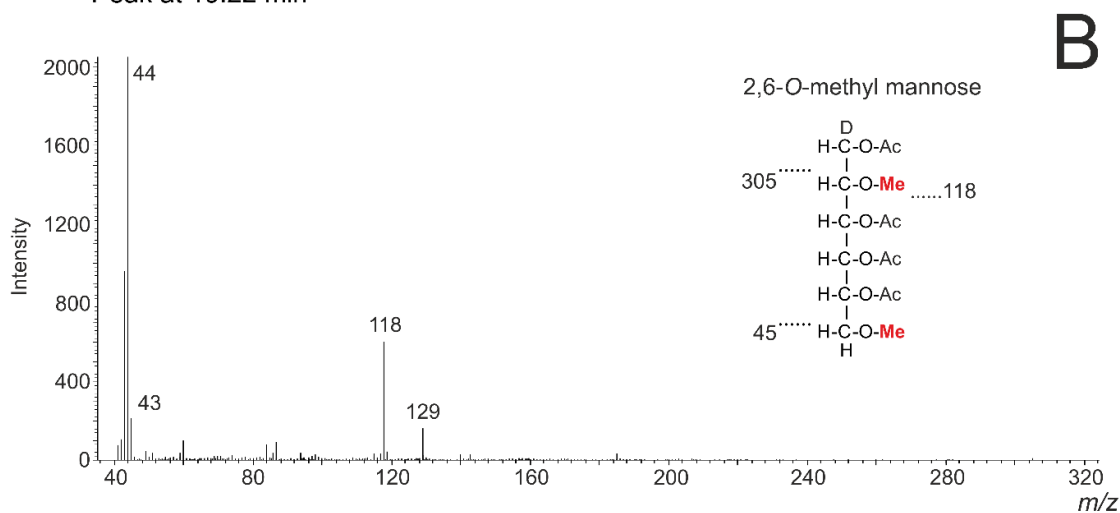

**Figure S5B: Localization of the methyl groups on the mannose of MMXF of *Plagiomnium undulatum*.** (A): GM-MS chromatogram of the hydrolyzed and peracetylated main glycans from *Plagiomnium undulatum* without the treatment of iodomethane- $d_3$ . (B): MS spectrum of the peak “19.22 min”. With these measurements the methylation sites of the mannose were shown.

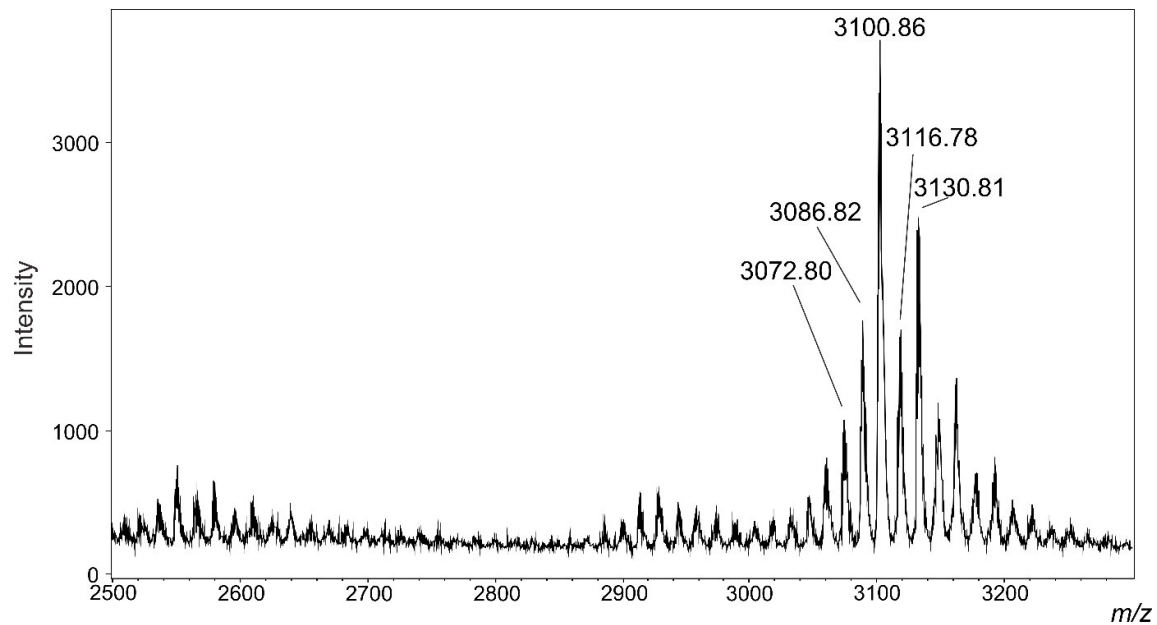

**Figure S6: MALDI-MS spectrum of permethylated 2553 [M+Na]<sup>+</sup> of *Plagiomnium undulatum*. 3100.86 [M+Na]<sup>+</sup> represents the permethylated glycan.**
